# Supplementary material
Source: PubMed Central journal article supplement (PMC4400763)

**Table A1 - *B. cenocepacia* ST32 isolates from patients not experiencing CS used in this study.** Isolates were recovered from sputum sample.

|                                                       | Isolate # |         |         |         |         |         |         |
|-------------------------------------------------------|-----------|---------|---------|---------|---------|---------|---------|
|                                                       | Patient   | 1       | 2       | 3       | 4       | 5       | 6       |
| <b>Patients not experiencing<br/>cepacia syndrome</b> | I         | 4/2002  | 11/2004 | 9/2008  | 11/2009 | 1/2014  |         |
|                                                       | J         | 10/2008 | 3/2010  | 4/2011  | 4/2013  | 5/2014  |         |
|                                                       | K         | 9/2007  | 8/2011  | 8/2013  | 6/2014  |         |         |
|                                                       | L         | 9/2005  | 9/2010  | 11/2011 | 5/2013  | 10/2014 |         |
|                                                       | M         | 2/2005  | 10/2006 | 3/2008  | 2/2010  | 6/2012  | 11/2014 |
|                                                       | N         | 2/2006  | 2/2008  | 1/2010  | 3/2011  | 11/2011 | 7/2014  |
|                                                       | O         | 4/2005  | 8/2007  | 11/2009 | 1/2011  | 3/2012  | 10/2013 |
|                                                       | P         | 1/2004  | 3/2005  | 5/2007  | 2/2010  | 8/2013  | 7/2014  |
|                                                       | Q         | 1/2004  | 2/2006  | 3/2008  | 9/2011  | 8/2013  | 5/2014  |
|                                                       | R         | 4/2010  | 9/2011  | 7/2013  | 7/2014  |         |         |
|                                                       | S         | 2/2010  | 8/2011  | 1/2013  | 5/2014  |         |         |
|                                                       | T         | 11/2006 | 5/2007  | 10/2009 | 10/2011 | 3/2012  | 7/2014  |
|                                                       | U         | 5/2007  | 2/2008  | 1/2010  | 11/2011 |         |         |
|                                                       | V         | 3/2008  | 10/2010 | 12/2011 | 3/2013  | 10/2014 |         |
|                                                       | W         | 2/2008  | 11/2009 | 1/2011  | 6/2012  | 2/2014  |         |
| X                                                     | 4/2009    | 7/2010  | 9/2011  | 1/2012  | 11/2013 | 10/2014 |         |
| Y                                                     | 10/2007   | 12/2009 | 9/2011  | 7/2013  | 2/2014  | 10/2014 |         |

**Table A2 - A genelist resulting from comparison of blood isolates with sputum isolates; specific to isolates of Patient A only (comparison defined in [iv] Table 3)**

| <b>Gene</b>    | <b>Annotation or putative gene function</b>                              | <b>Fold change</b> |
|----------------|--------------------------------------------------------------------------|--------------------|
| BCAL0112       | Adenosylhomocysteinase                                                   | 4.9 ↓              |
| BCAL0113       | Flagellar hook-associated 2 domain protein                               | 4.4 ↓              |
| BCAL0114       | Flagellin-like protein                                                   | 14.6 ↓             |
| BCAL0125       | Flagellar transcriptional regulator FlhC 1                               | 4.6 ↓              |
| BCAL0126       | Flagellar motor component-like protein                                   | 4.1 ↓              |
| BCAL0127       | OmpA/MotB domain protein., Flagellar motor protein                       | 2.4 ↓              |
| BCAL0128       | Response regulator receiver                                              | 3.8 ↓              |
| BCAL0129       | Chemotaxis two-component sensor kinase CheA                              | 4.6 ↓              |
| BCAL0132       | Chemotaxis protein methyltransferase CheR                                | 4.1 ↓              |
| BCAL0134       | Chemotaxis response regulator protein-glutamate methyltransferase        | 2.8 ↓              |
| BCAL0514       | Hypothetical protein                                                     | 2.2 ↓              |
| BCAL0534       | Two component LuxR family transcriptional regulator                      | 2.9 ↓              |
| BCAL0535       | Putative signal transduction histidine kinase                            | 2.9 ↓              |
| BCAL0577       | Flagellar hook-associated protein 3                                      | 5.4 ↓              |
| BCAL1028_J_0_1 | Transposase IS116/IS110/IS902 family protein                             | 2.7 ↓              |
| BCAL2025       | Hypothetical protein                                                     | 4.5 ↓              |
| BCAL2610       | ABC-type amino acid transport system                                     | 2.3 ↓              |
| BCAL2611       | Histidine transport system permease protein                              | 2.4 ↓              |
| BCAL2612       | Amino acid ABC transporter ATP-binding protein                           | 3.1 ↓              |
| BCAL2793       | 4-hydroxybenzoate transporter                                            | 3.4 ↓              |
| BCAL2796       | Pyruvate decarboxylase                                                   | 2.2 ↓              |
| BCAL3205a      | Transcriptional regulator, XRE family                                    | 3.6 ↓              |
| BCAL3207       | Hypothetical protein                                                     | 2.4 ↓              |
| BCAM1002       | Putative reverse transcriptase-Group II intron                           | 2.0 ↓              |
| BCAM1804       | Methyl-accepting chemotaxis protein                                      | 3.6 ↓              |
| BCAM2346       | OmpW family protein                                                      | 2.1 ↓              |
| BCAM2684       | GCN5-related N-acetyltransferase                                         | 3.1 ↓              |
| BCAM2685       | Hypothetical protein                                                     | 5.3 ↓              |
| BCAM2837_J_1   | Response regulator receiver                                              | 2.1 ↓              |
| IG1_147730     | Flagellar motor component-like protein                                   | 6.2 ↓              |
| BCAL0009       | Putative pterin-4-alpha-carbinolamine dehydratase                        | 3.8 ↑              |
| BCAL0010       | Phenylalanine-4-hydroxylase                                              | 20.8 ↑             |
| BCAL0015       | ABC transporter, hydrophobic amino acid uptake transporter (HAAT) family | 2.5 ↑              |
| BCAL0016       | Amino acid/amide ABC transporter ATP-binding protein 2                   | 2.1 ↑              |
| BCAL0017       | ABC branched-chain amino acid family transporter                         | 2.1 ↑              |
| BCAL0049       | Aminotransferase class I and II                                          | 2.8 ↑              |
| BCAL0052       | FAD linked oxidase domain protein                                        | 2.3 ↑              |

| <b>Gene</b>  | <b>Annotation or putative gene function</b>                      | <b>Fold change</b> |
|--------------|------------------------------------------------------------------|--------------------|
| BCAL0833     | Putative Acetoacetyl-CoA reductase                               | 3.2 ↑              |
| BCAL0834     | Hypothetical protein                                             | 2.8 ↑              |
| BCAL1040     | Glycosyl transferase                                             | 2.1 ↑              |
| BCAL1236     | Hypothetical protein                                             | 3.3 ↑              |
| BCAL2450     | Chromate transporter                                             | 2.0 ↑              |
| BCAL2471     | ATPase-like protein                                              | 2.5 ↑              |
| BCAL2472     | Alpha,alpha-trehalose-phosphate synthase [UDP-forming]           | 2.9 ↑              |
| BCAL2739     | Elongation factor G 1                                            | 7.2 ↑              |
| BCAL2740     | High-affinity nickel-transporter                                 | 2.2 ↑              |
| BCAL3008     | Outer membrane protein (Porin)                                   | 2.0 ↑              |
| BCAL3184     | Homogentisate 1,2-dioxygenase                                    | 8.8 ↑              |
| BCAL3185     | Major facilitator superfamily MFS 1                              | 2.9 ↑              |
| BCAL3186     | Hypothetical protein                                             | 6.0 ↑              |
| BCAL3187     | Monooxygenase FAD-binding                                        | 6.3 ↑              |
| BCAL3194     | Membrane protein                                                 | 2.1 ↑              |
| BCAL3195     | Uncharacterised protein                                          | 6.8 ↑              |
| BCAL3282     | Phospho-2-dehydro-3-deoxyheptonate aldolase                      | 4.7 ↑              |
| BCAL3283     | Prevent-host-death family protein                                | 6.4 ↑              |
| BCAL3284     | PilT protein domain protein                                      | 5.0 ↑              |
| BCAM0059     | 3-oxoadipate CoA-transferase                                     | 2.6 ↑              |
| BCAM0783     | General substrate transporter:Major facilitator superfamily      | 2.5 ↑              |
| BCAM0803     | Muconolactone delta-isomerase                                    | 2.7 ↑              |
| BCAM0804     | Catechol 1,2-dioxygenase                                         | 4.5 ↑              |
| BCAM0805     | Muconate cycloisomerase                                          | 7.6 ↑              |
| BCAM0810     | Anthranilate 1,2-dioxygenase large subunit                       | 5.6 ↑              |
| BCAM0811     | Anthranilate 1,2-dioxygenase small subunit                       | 7.6 ↑              |
| BCAM0856_J_1 | Sugar transferase                                                | 5.0 ↑              |
| BCAM0859     | Capsular exopolysaccharide family                                | 2.8 ↑              |
| BCAM0860     | Glycosyl transferase, family 2                                   | 4.6 ↑              |
| BCAM0861     | Glycosyltransferase-like protein                                 | 2.9 ↑              |
| BCAM0863     | Glycosyltransferase                                              | 2.9 ↑              |
| BCAM1005     | Acyltransferase 3                                                | 3.0 ↑              |
| BCAM1010     | UTP-glucose-1-phosphate uridylyltransferase                      | 3.2 ↑              |
| BCAM1172     | FAD dependent oxidoreductase                                     | 16.2 ↑             |
| BCAM1173     | Gaba permease (4-amino butyrate transport carrier)               | 6.2 ↑              |
| BCAM1176     | DMSO reductase anchor subunit (DmsC)                             | 3.5 ↑              |
| BCAM1180     | Predicted permease                                               | 3.9 ↑              |
| BCAM1185     | Hypothetical protein                                             | 2.2 ↑              |
| BCAM1186     | Putative NADP-dependent glyceraldehyde-3-phosphate dehydrogenase | 5.1 ↑              |
| BCAM1416     | Lysine exporter protein                                          | 3.3 ↑              |
| BCAM1417     | Sensor protein copS                                              | 2.2 ↑              |
| BCAM1418     | Two component heavy metal response transcriptional regulator     | 2.0 ↑              |
| BCAM1421     | Cation/multidrug efflux pump                                     | 5.5 ↑              |
| BCAM1869     | Hypothetical protein                                             | 2.4 ↑              |
| BCAM2043_J_0 | Hypothetical protein                                             | 3.1 ↑              |
| BCAM2046     | Type III secretion protein SctT                                  | 2.4 ↑              |
| BCAM2049     | BcsL, type III secretion apparatus protein                       | 3.9 ↑              |

| <b>Gene</b> | <b>Annotation or putative gene function</b> | <b>Fold change</b> |
|-------------|---------------------------------------------|--------------------|
| BCAM2050    | BcscK, Putative uncharacterized protein     | 5.6 ↑              |
| BCAM2051    | Type III secretion apparatus lipoprotein    | 3.7 ↑              |
| BCAM2053    | Hypothetical protein                        | 4.7 ↑              |
| BCAM2055    | Type III secretion outer membrane pore      | 3.4 ↑              |
| BCAM2073    | Hypothetical protein                        | 2.5 ↑              |
| BCAM2165    | Beta-lactamase                              | 2.3 ↑              |
| BCAM2503    | 4-hydroxyphenylpyruvate dioxygenase         | 3.8 ↑              |
| BCAS0251    | Hypothetical protein                        | 3.4 ↑              |
| BCAS0637    | 60 kDa chaperonin 2                         | 2.7 ↑              |
| BCAS0638    | 10 kDa chaperonin 3                         | 2.3 ↑              |
| IG2_943874  | UDP-glucose dehydrogenase                   | 4.2 ↑              |

*The maximum of up-regulated genes for flagella in isolate from sputum (A7) was seen in comparison Table 2b, point i, patient A.*

**Table A3 - Quantitative PCR on 6 genes with different expression in blood vs. sputum isolates as detected by microarrays**

(indicated at the bottom of the table)

| <i>Patient ID</i>         | <i>Comparison</i>    | <i>T3SS</i>     |                 | <i>Capsule</i>  |                 | <i>QS</i>       |                 |
|---------------------------|----------------------|-----------------|-----------------|-----------------|-----------------|-----------------|-----------------|
|                           |                      | <b>BCAM2048</b> | <b>BCAM2050</b> | <b>BCAM0859</b> | <b>BCAM0860</b> | <b>BCAM1870</b> | <b>BCAM1871</b> |
| <b>A</b>                  | A3 x A2              | ↑9.8x           | ↑9.2x           | ↑30x            | ↑23.6x          | ↑19.7x          | ↑22.7x          |
| <b>B</b>                  | B8 x B7              | ↑16.7x          | ↑20.3x          | ↑26.2x          | ↑22.12          | ↑9.1x           | ↑17.7x          |
| <b>C<sup>a</sup></b>      | C6 x C5              | no change       |
|                           | C6 x C4              | ↑6x             | ↑6.9x           | ↑10.2x          | ↑6.9x           | ↑4.8x           | ↑11.5x          |
| <b>D</b>                  | D8 x D6              | ↑9.3x           | ↑8.5x           | ↑7.1x           | ↑10.2x          | ↓12.1x          | ↓9.1x           |
| <b>E<sup>a</sup></b>      | E6 x E4              | ↑4x             | no change       |
|                           | E6 x E3              | ↑9x             | ↑9x             | ↑12.1x          | ↑9x             | ↑3x             | ↑7.6x           |
| <b>F<sup>a</sup></b>      | F3 x F2              | ↑14.8x          | ↑15.1x          | no change       | ↑8.6x           | ↓30x            | ↓9.7x           |
|                           | F3 x F1              | ↑14.8x          | ↑15.2x          | no change       | no change       | ↓3.2x           | ↓13.9x          |
| <b>G</b>                  | G5 x G4              | ↑21.2x          | ↑22.4x          | ↑10.9x          | ↑11.2x          | ↑6x             | ↑8.3x           |
| <b>H<sup>a</sup></b>      | H8 x H9              | ↑20.8x          | ↑14.9x          | ↑13.7x          | ↑16.3x          | ↑22.4x          | ↑20x            |
|                           | H8 x H6              | ↑16.6x          | ↑20.9x          | ↑12.7x          | ↑8.6x           | ↓12.1x          | no change       |
|                           | H8 x H5              | ↑4.4x           | ↑3x             | ↑4.8x           | ↑3x             | ↓17.8x          | ↓15.1x          |
| <b>Microarray results</b> | <b>A3+B8 x A2+B7</b> | <b>↑4.9x</b>    | <b>↑7.3x</b>    | <b>↑2.8x</b>    | <b>↑4.7x</b>    | <b>↑3.9x</b>    | <b>↑4.5x</b>    |

<sup>a</sup>Comparison of blood isolate with additional sputum isolate was performed if analysis with a preceding sputum isolate (isolated closer in time to a blood isolate) showed no change in expression.

**Figure A1 - Swimming motility of isolates from patients not experiencing CS.**  
 The detected substantial decrease in motility is indicated with a grey arrow.

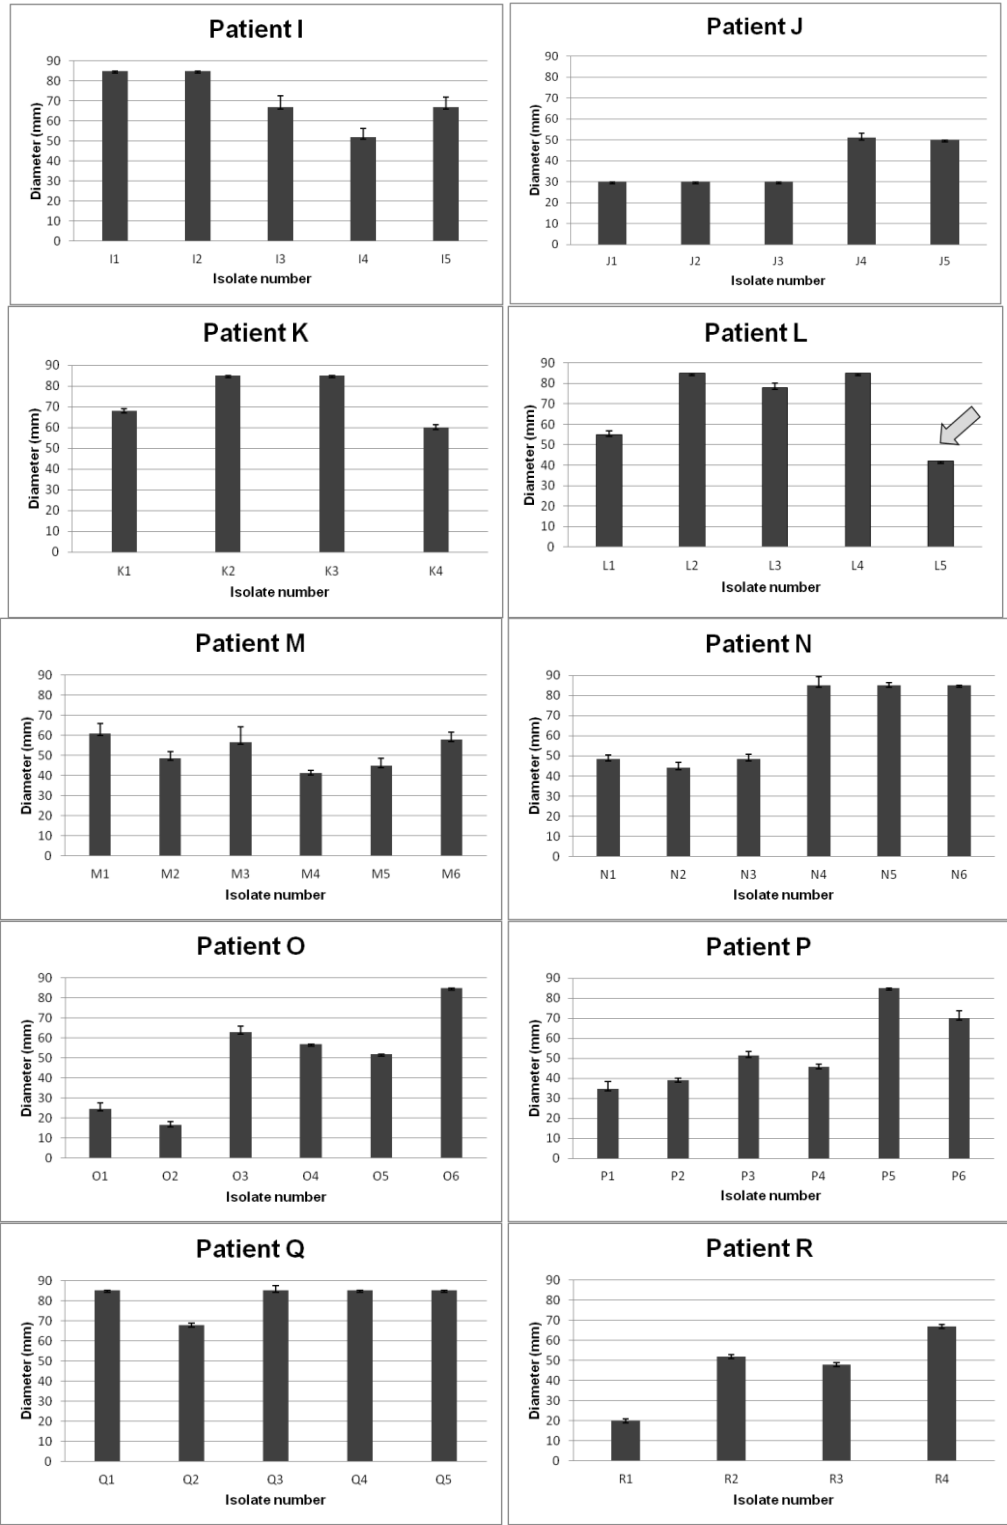

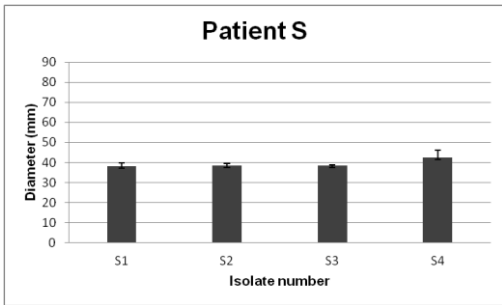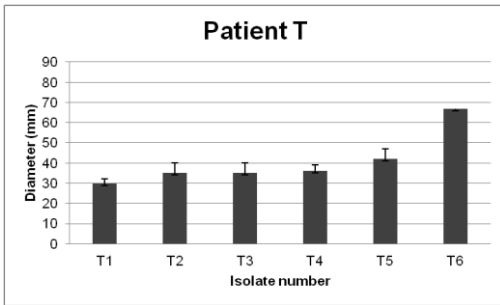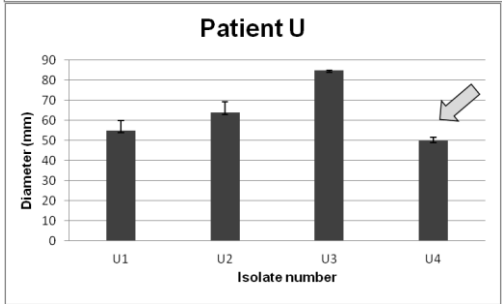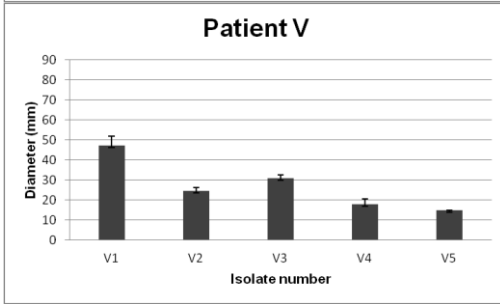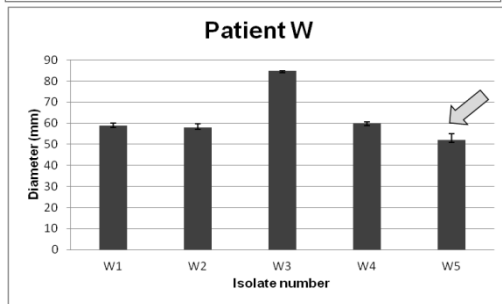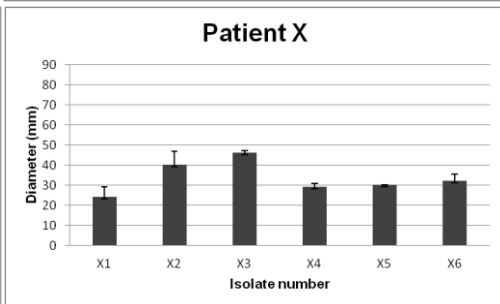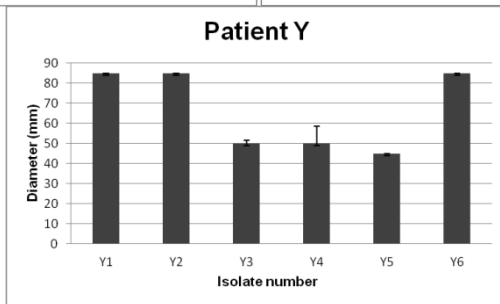

Supplement: JCM.03605-14_zjm999094199so1.pdf [file JCM.03605-14_zjm999094199so1.pdf]
